# Supplementary material for: Heavy Metal Transporters-Associated Proteins in Solanum tuberosum: Genome-Wide Identification, Comprehensive Gene Feature, Evolution and Expression Analysis
Source: PubMed Central journal article supplement (PMC7694169; doi:10.3390/genes11111269), 2020-10-28
Supplement: genes-11-01269-s001.pdf [file genes-11-01269-s001.pdf]

## SUPPLEMENTARY MATERIALS

### Heavy Metal Transporters-Associated Proteins in *S. tuberosum* : Genome-wide Identification, Comprehensive Gene Feature, Evolution and Expression Analysis

Guandi He <sup>1</sup>, Lijun Qin <sup>1</sup>, Weijun Tian <sup>2</sup>, Lulu Meng <sup>2</sup>, Tengbing He <sup>2,3,\*</sup> and Degang Zhao <sup>1,4,\*</sup>

<sup>1</sup> The Key Laboratory of Plant Resources Conservation and Germplasm Innovation in Mountainous Region (Ministry of Education), Institute of Agro-Bioengineering and College of Life Sciences, Guizhou University, Guiyang 550025, China; gs.gthe15@gzu.edu.cn (G.H.); lj Qin@gzu.edu.cn (L.Q.)

<sup>2</sup> Agricultural College, Guizhou University, Guiyang 550025, China; gs.tianwj18@gzu.edu.cn (W.T.); gs.llmeng18@gzu.edu.cn (L.M.)

<sup>3</sup> Institute of New Rural Development of Guizhou University, Guiyang 550025, China

<sup>4</sup> Guizhou Academy of Agricultural Science, Guiyang 550025, China

\* Correspondence: tbhe@gzu.edu.cn (T.H.); dgzhao@gzu.edu.cn (D.Z.)

#### Supplementary table legends

Table S1: qRT-PCR primers for expression analysis of *StHMA* gene family in *Solanum tuberosum*;

Table S2: The IDs of 36 HMA genes as well as their properties in *S. tuberosum*;

Table S3: Subcellular localization prediction of *StHMA* gene family in potato;

Table S4: Ka/Ks ratios of homologous gene pairs between potato and different species;

Table S5: Motif sequences of heavy-metal associated proteins in *S. tuberosum*, *A. thaliana*, *O. sativa* and *S. lycopersicum*;

Table S6: Abiotic stress-related cis-acting elements in the promoter region of *StHMA* genes;

Table S7: RNA-seq data of potato *StHMA* genes in different tissues.

Table S1. qRT-PCR primers for expression analysis of *StHMA* gene family in *Solanum tuberosum*.

| Gene           | Transcripts ID       | Primer name      | Primer sequence        |
|----------------|----------------------|------------------|------------------------|
| <i>EF-1a</i>   | -                    | <i>EF1a-F</i>    | TCCTTACCTGAACGCCTGTCA  |
|                |                      | <i>EF1a-R</i>    | ATTGGAAACGGATATGCTCCA  |
| <i>StHMA1</i>  | PGSC0003DMT400043033 | <i>StHMA1-F</i>  | CCCATTTTGCTCACCTTCC    |
|                |                      | <i>StHMA1-R</i>  | CCGTTTATGCGACTCACAG    |
| <i>StHMA2</i>  | PGSC0003DMT400045359 | <i>StHMA2-F</i>  | ACATCTGATTGCTGCTTGG    |
|                |                      | <i>StHMA2-R</i>  | ACATGGTGTGAGATTTGGCG   |
| <i>StHMA4</i>  | PGSC0003DMT400009920 | <i>StHMA4-F</i>  | GCCCTCCTTGTTGCATACTG   |
|                |                      | <i>StHMA4-R</i>  | AACAGGGGAAAGGAGGGAAC   |
| <i>StHMA8</i>  | PGSC0003DMT400069249 | <i>StHMA8-F</i>  | GCCTTCTTACCTGTGCGATG   |
|                |                      | <i>StHMA8-R</i>  | CTGTGAAGGCTGTGAGAGGA   |
| <i>StHMA11</i> | PGSC0003DMT400018392 | <i>StHMA11-F</i> | ACACTCTCGCTGGATCAACA   |
|                |                      | <i>StHMA11-R</i> | CGACGTACCAAAGGAGACC    |
| <i>StHMA16</i> | PGSC0003DMT400016647 | <i>StHMA16-F</i> | CACCTGAAGTTTGGAGTCCG   |
|                |                      | <i>StHMA16-R</i> | GGCTCACCTCGATGTTTAGTG  |
| <i>StHMA17</i> | PGSC0003DMT400029503 | <i>StHMA17-F</i> | TGTTTCCTAGGTCCGTCGTT   |
|                |                      | <i>StHMA17-R</i> | CCTTGCCAAAACCACCAGA    |
| <i>StHMA19</i> | PGSC0003DMT400060398 | <i>StHMA19-F</i> | CAGTGGATTGTGCTGCCTTC   |
|                |                      | <i>StHMA19-R</i> | ATGGACTGTGAAGTTGTGC    |
| <i>StHMA22</i> | PGSC0003DMT400001032 | <i>StHMA22-F</i> | ACCCAACACTAACAGTACCCT  |
|                |                      | <i>StHMA22-R</i> | TCTATGTCAGTTTGACACGAG  |
| <i>StHMA25</i> | PGSC0003DMT400021739 | <i>StHMA25-F</i> | GGTTCTGCATTCTCCACACC   |
|                |                      | <i>StHMA25-R</i> | CTCCAATCCCAAACCACCG    |
| <i>StHMA31</i> | PGSC0003DMT400024481 | <i>StHMA31-F</i> | CGTCACAATGCTGCTGAACT   |
|                |                      | <i>StHMA31-R</i> | ACTAAGAAGAAGGTGGCGCT   |
| <i>StHMA33</i> | PGSC0003DMT400015784 | <i>StHMA33-F</i> | CACGGACTTTGTTTCGGGTT   |
|                |                      | <i>StHMA33-R</i> | TGGGCAAAATGGAAGGTGTT   |
| <i>StHMA34</i> | PGSC0003DMT400083194 | <i>StHMA34-F</i> | CTCCTTTTCCTTTGCCGTCC   |
|                |                      | <i>StHMA34-R</i> | AGAAAGTTACGTGCGATGCC   |
| <i>StHMA35</i> | PGSC0003DMT400040203 | <i>StHMA35-F</i> | AGGACGAAGAAGCTGTTGGA   |
|                |                      | <i>StHMA35-R</i> | ATCAACTCGTTCATGCCCTG   |
| <i>StHMA36</i> | PGSC0003DMT400073578 | <i>StHMA36-F</i> | TGGAAAGCTAGAGTTGGAGGT  |
|                |                      | <i>StHMA36-R</i> | TGGCGTTGTAGAAATGAGGAAG |

Gene-specific primers for real-time reverse transcription quantitative PCR (RT-qPCR) were designed by the Primer 6. F, forward; R, reverse.

Table S2. The IDs of 36 HMA genes as well as their properties in *S. tuberosum*.

| Gene name | Transcripts ID       | Positive or negative chains | Amino acid | Molecular weight | Isoelectric point | Formula                                                                                 | Chromosome location |
|-----------|----------------------|-----------------------------|------------|------------------|-------------------|-----------------------------------------------------------------------------------------|---------------------|
| StHMA1    | PGSC0003DMT400015954 | +                           | 380        | 43356.31         | 5.78              | C <sub>1897</sub> H <sub>2823</sub> N <sub>547</sub> O <sub>605</sub> S <sub>12</sub>   | 3991348-3993998     |
| StHMA2    | PGSC0003DMT400029503 | +                           | 291        | 32740.54         | 6.9               | C <sub>1434</sub> H <sub>2220</sub> N <sub>410</sub> O <sub>449</sub> S <sub>11</sub>   | 4674833-4676481     |
| StHMA3    | PGSC0003DMT400083194 | -                           | 565        | 57889.92         | 8.58              | C <sub>2426</sub> H <sub>3843</sub> N <sub>741</sub> O <sub>798</sub> S <sub>54</sub>   | 39130570-39131689   |
| StHMA4    | PGSC0003DMT400073578 | +                           | 436        | 46116.6          | 8.61              | C <sub>1939</sub> H <sub>3031</sub> N <sub>589</sub> O <sub>632</sub> S <sub>44</sub>   | 255158-259620       |
| StHMA5    | PGSC0003DMT400063687 | -                           | 372        | 40439.98         | 6.81              | C <sub>1765</sub> H <sub>2789</sub> N <sub>491</sub> O <sub>581</sub> S <sub>8</sub>    | 5119621-5121945     |
| StHMA6    | PGSC0003DMT400032792 | -                           | 70         | 7687.09          | 9.3               | C <sub>335</sub> H <sub>554</sub> N <sub>96</sub> O <sub>96</sub> S <sub>7</sub>        | 52462897-52464137   |
| StHMA7    | PGSC0003DMT400032707 | -                           | 234        | 24180.04         | 7.64              | C <sub>1031</sub> H <sub>1671</sub> N <sub>313</sub> O <sub>340</sub> S <sub>9</sub>    | 47318701-47321428   |
| StHMA8    | PGSC0003DMT400015784 | -                           | 153        | 17285.76         | 9.16              | C <sub>754</sub> H <sub>1206</sub> N <sub>222</sub> O <sub>226</sub> S <sub>9</sub>     | 81897447-81900463   |
| StHMA9    | PGSC0003DMT400024409 | -                           | 1002       | 107196.01        | 5.16              | C <sub>4819</sub> H <sub>7704</sub> N <sub>1246</sub> O <sub>1428</sub> S <sub>39</sub> | 49903753-49905385   |
| StHMA10   | PGSC0003DMT400009388 | -                           | 121        | 138879.87        | 9.15              | C <sub>610</sub> H <sub>964</sub> N <sub>178</sub> O <sub>179</sub> S <sub>7</sub>      | 87577228-87580997   |
| StHMA11   | PGSC0003DMT400078635 | +                           | 148        | 16948.78         | 9.98              | C <sub>746</sub> H <sub>1219</sub> N <sub>221</sub> O <sub>211</sub> S <sub>9</sub>     | 76432065-76434200   |
| StHMA12   | PGSC0003DMT400043033 | +                           | 158        | 17904.9          | 9.71              | C <sub>805</sub> H <sub>1288</sub> N <sub>220</sub> O <sub>225</sub> S <sub>8</sub>     | 48216723-48218378   |
| StHMA13   | PGSC0003DMT400037204 | -                           | 139        | 15474.69         | 7                 | C <sub>696</sub> H <sub>1071</sub> N <sub>183</sub> O <sub>203</sub> S <sub>7</sub>     | 77329843-77331651   |
| StHMA14   | PGSC0003DMT400068079 | +                           | 326        | 36878.9          | 6.12              | C <sub>1612</sub> H <sub>2603</sub> N <sub>443</sub> O <sub>515</sub> S <sub>14</sub>   | 52417462-52421546   |
| StHMA15   | PGSC0003DMT400001501 | -                           | 304        | 33894.57         | 5.11              | C <sub>1481</sub> H <sub>2400</sub> N <sub>398</sub> O <sub>479</sub> S <sub>14</sub>   | 27194995-27203856   |
| StHMA16   | PGSC0003DMT400015350 | +                           | 147        | 16606.14         | 9.49              | C <sub>731</sub> H <sub>1177</sub> N <sub>201</sub> O <sub>221</sub> S <sub>9</sub>     | 58029029-58030494   |
| StHMA17   | PGSC0003DMT400038828 | -                           | 273        | 31631.03         | 5.3               | C <sub>1365</sub> H <sub>2257</sub> N <sub>377</sub> O <sub>452</sub> S <sub>14</sub>   | 46312673-46314684   |
| StHMA18   | PGSC0003DMT400056666 | +                           | 152        | 17169.87         | 9.4               | C <sub>759</sub> H <sub>1214</sub> N <sub>202</sub> O <sub>228</sub> S <sub>11</sub>    | 61538313-61541184   |
| StHMA19   | PGSC0003DMT400024479 | +                           | 150        | 16456.18         | 9.46              | C <sub>729</sub> H <sub>1187</sub> N <sub>197</sub> O <sub>216</sub> S <sub>9</sub>     | 42949396-42951085   |
| StHMA20   | PGSC0003DMT400024481 | +                           | 150        | 16502.2          | 9.46              | C <sub>733</sub> H <sub>1185</sub> N <sub>197</sub> O <sub>216</sub> S <sub>9</sub>     | 55464451-55465720   |
| StHMA21   | PGSC0003DMT400078487 | -                           | 414        | 46005.21         | 8.1               | C <sub>1952</sub> H <sub>3070</sub> N <sub>598</sub> O <sub>635</sub> S <sub>29</sub>   | 53411225-53413634   |
| StHMA22   | PGSC0003DMT400056199 | -                           | 154        | 17393.09         | 9.45              | C <sub>767</sub> H <sub>1231</sub> N <sub>211</sub> O <sub>229</sub> S <sub>10</sub>    | 2063369-2064790     |
| StHMA23   | PGSC0003DMT400021739 | -                           | 363        | 40443.68         | 6.66              | C <sub>1780</sub> H <sub>2750</sub> N <sub>488</sub> O <sub>547</sub> S <sub>22</sub>   | 9201119-9206477     |
| StHMA24   | PGSC0003DMT400060398 | +                           | 77         | 8105.27          | 5.31              | C <sub>349</sub> H <sub>576</sub> N <sub>94</sub> O <sub>116</sub> S <sub>5</sub>       | 5557033-5561866     |
| StHMA25   | PGSC0003DMT400069249 | -                           | 336        | 38003.29         | 5.91              | C <sub>1668</sub> H <sub>2708</sub> N <sub>462</sub> O <sub>526</sub> S <sub>11</sub>   | 45208003-45209479   |
| StHMA26   | PGSC0003DMT400018392 | +                           | 253        | 28277.42         | 8.88              | C <sub>1220</sub> H <sub>2035</sub> N <sub>351</sub> O <sub>392</sub> S <sub>12</sub>   | 41760071-41760891   |
| StHMA27   | PGSC0003DMT400079324 | +                           | 180        | 20955.88         | 9.1               | C <sub>926</sub> H <sub>1428</sub> N <sub>268</sub> O <sub>266</sub> S <sub>12</sub>    | 55143456-55145580   |
| StHMA28   | PGSC0003DMT400009920 | +                           | 367        | 39867.1          | 8.52              | C <sub>1734</sub> H <sub>2798</sub> N <sub>484</sub> O <sub>560</sub> S <sub>15</sub>   | 62455552-62456793   |
| StHMA29   | PGSC0003DMT400016647 | +                           | 221        | 25708.87         | 9.23              | C <sub>1153</sub> H <sub>1869</sub> N <sub>309</sub> O <sub>337</sub> S <sub>8</sub>    | 40987375-40990668   |
| StHMA30   | PGSC0003DMT400045359 | -                           | 300        | 32396.97         | 9.57              | C <sub>1391</sub> H <sub>2316</sub> N <sub>404</sub> O <sub>453</sub> S <sub>14</sub>   | 62479681-62480683   |
| StHMA31   | PGSC0003DMT400072448 | +                           | 166        | 18145.94         | 9.38              | C <sub>799</sub> H <sub>1327</sub> N <sub>227</sub> O <sub>244</sub> S <sub>4</sub>     | 5176268-5179031     |

|         |                      |   |     |          |      |                                                                                       |                   |
|---------|----------------------|---|-----|----------|------|---------------------------------------------------------------------------------------|-------------------|
| StHMA32 | PGSC0003DMT400034599 | - | 140 | 16163.83 | 6.36 | C <sub>697</sub> H <sub>1171</sub> N <sub>199</sub> O <sub>217</sub> S <sub>11</sub>  | 47049115-47050456 |
| StHMA33 | PGSC0003DMT400050141 | + | 106 | 11370.89 | 4.72 | C <sub>497</sub> H <sub>802</sub> N <sub>128</sub> O <sub>165</sub> S <sub>5</sub>    | 11452548-11454378 |
| StHMA34 | PGSC0003DMT400020973 | + | 341 | 36542.76 | 9.21 | C <sub>1571</sub> H <sub>2587</sub> N <sub>453</sub> O <sub>505</sub> S <sub>20</sub> | 81766806-81768151 |
| StHMA35 | PGSC0003DMT400040203 | + | 260 | 28825.83 | 9.76 | C <sub>1251</sub> H <sub>2027</sub> N <sub>363</sub> O <sub>391</sub> S <sub>13</sub> | 50982683-50987786 |
| StHMA36 | PGSC0003DMT400001032 | - | 149 | 16708.3  | 5.78 | C <sub>732</sub> H <sub>1183</sub> N <sub>199</sub> O <sub>224</sub> S <sub>11</sub>  | 20055033-20059032 |

Table S3. Subcellular localization prediction of StHMA gene family in potato.

| Gene           | Cytoplasmic | Nucleus | Peroxisome | Plasma membrane | Mitochondrion | Chloroplast | Extracellular matrix | Vacuole | Endoplasmic reticulum |
|----------------|-------------|---------|------------|-----------------|---------------|-------------|----------------------|---------|-----------------------|
| <i>StHMA1</i>  | —           | 10      | 2          | —               | —             | 1           | —                    | —       | —                     |
| <i>StHMA2</i>  | 1           | 10      | —          | —               | —             | 2           | —                    | —       | —                     |
| <i>StHMA3</i>  | 6           | 7       | —          | —               | —             | —           | —                    | —       | —                     |
| <i>StHMA4</i>  | 1           | 8       | 2          | 2               | —             | —           | —                    | —       | —                     |
| <i>StHMA5</i>  | —           | 13      | —          | —               | —             | —           | —                    | —       | —                     |
| <i>StHMA6</i>  | 2           | 6       | —          | —               | 1             | 4           | —                    | —       | —                     |
| <i>StHMA7</i>  | —           | —       | —          | —               | 3             | 11          | —                    | —       | —                     |
| <i>StHMA8</i>  | —           | 2       | —          | —               | —             | 11          | —                    | —       | —                     |
| <i>StHMA9</i>  | 4           | —       | —          | 6               | —             | 4           | —                    | —       | 1                     |
| <i>StHMA10</i> | 4           | —       | —          | —               | 2             | 7           | —                    | —       | —                     |
| <i>StHMA11</i> | —           | 3       | —          | 2               | 2             | 4           | —                    | —       | —                     |
| <i>StHMA12</i> | 11          | —       | —          | —               | —             | 1           | 1                    | —       | —                     |
| <i>StHMA13</i> | 14          | —       | —          | —               | —             | —           | —                    | —       | —                     |
| <i>StHMA14</i> | 1           | 1       | —          | —               | —             | 11          | —                    | —       | —                     |
| <i>StHMA15</i> | 3           | —       | —          | —               | —             | 8           | 3                    | —       | —                     |
| <i>StHMA16</i> | 4           | 2       | —          | —               | —             | 5           | 2                    | —       | —                     |
| <i>StHMA17</i> | 3           | 7       | —          | 1               | —             | —           | 2                    | —       | —                     |
| <i>StHMA18</i> | 2           | 1       | —          | —               | —             | 10          | —                    | —       | —                     |
| <i>StHMA19</i> | —           | —       | —          | —               | —             | 14          | —                    | —       | —                     |
| <i>StHMA20</i> | —           | —       | —          | —               | —             | 14          | —                    | —       | —                     |
| <i>StHMA21</i> | 1           | 4       | —          | 1               | 7             | —           | —                    | —       | —                     |
| <i>StHMA22</i> | 10          | —       | —          | —               | —             | 30          | —                    | —       | —                     |
| <i>StHMA23</i> | 2           | 3       | —          | 2               | 1             | 2           | 1                    | 2       | —                     |

|                |    |   |   |   |   |    |   |   |   |
|----------------|----|---|---|---|---|----|---|---|---|
| <i>StHMA24</i> | 2  | — | — | — | — | 11 | — | — | — |
| <i>StHMA25</i> | 2  | 5 | — | — | — | 7  | — | — | — |
| <i>StHMA26</i> | —  | — | — | — | — | —  | — | — | — |
| <i>StHMA27</i> | —  | — | — | — | — | 13 | — | — | — |
| <i>StHMA28</i> | 7  | 7 | — | — | — | —  | — | — | — |
| <i>StHMA29</i> | 11 | 1 | — | — | 1 | —  | — | — | — |
| <i>StHMA30</i> | 2  | 1 | — | — | — | 3  | 6 | 1 | — |
| <i>StHMA31</i> | 7  | 6 | — | — | — | —  | — | — | — |
| <i>StHMA32</i> | 4  | — | — | — | 1 | 7  | 1 | — | — |
| <i>StHMA33</i> | —  | — | — | — | 1 | 11 | 1 | — | — |
| <i>StHMA34</i> | 2  | 4 | — | — | — | 7  | — | — | — |
| <i>StHMA35</i> | 1  | 2 | — | — | — | 10 | — | — | — |
| <i>StHMA36</i> | 1  | 2 | — | 1 | 2 | 6  | 1 | — | — |

Table S4. Ka/Ks ratios of homologous gene pairs between potato and different species.

| Homologous gene pairs                       | Ka        | Ks       | Ka/Ks     | P-Value(Fisher) | Length | Divergence-Time | ML-Score |
|---------------------------------------------|-----------|----------|-----------|-----------------|--------|-----------------|----------|
| <i>itb12g00660&amp;PGSC0003DMT400056666</i> | 0.0810865 | 4.38347  | 0.0184982 | 1.55E-84        | 441    | 1               | -844.906 |
| <i>itb01g02040&amp;PGSC0003DMT400032707</i> | 0.236192  | 1.08547  | 0.217594  | 2.60E-38        | 675    | 0.469979        | -1478.75 |
| <i>itb01g10210&amp;PGSC0003DMT400038828</i> | 0.185293  | 3.2623   | 0.0567982 | 7.47E-108       | 786    | 1               | -1551.19 |
| <i>itb03g24840&amp;PGSC0003DMT400001501</i> | 0.186874  | 1.80372  | 0.103605  | 1.07E-88        | 867    | 0.593468        | -1759.45 |
| <i>itb06g23970&amp;PGSC0003DMT400024479</i> | 0.109118  | 1.2642   | 0.0863138 | 1.91E-41        | 447    | 0.376053        | -866.649 |
| <i>itb07g13670&amp;PGSC0003DMT400018392</i> | 0.684371  | 0.354983 | 1.9279    | 6.34E-07        | 672    | 0.583759        | -1529.54 |
| <i>itb08g07490&amp;PGSC0003DMT400024409</i> | 0.0930473 | 0.887601 | 0.10483   | 4.34E-186       | 2976   | 0.287233        | -5629.53 |
| <i>itb12g00660&amp;PGSC0003DMT400056199</i> | 0.0846441 | 1.71071  | 0.0494789 | 5.20E-50        | 444    | 0.469529        | -842.093 |
| <i>itb12g04120&amp;PGSC0003DMT400078635</i> | 0.132712  | 3.09671  | 0.0428556 | 5.98E-72        | 438    | 0.854718        | -876.914 |
| <i>itb12g19630&amp;PGSC0003DMT400001032</i> | 0.216476  | 1.88086  | 0.115095  | 2.62E-42        | 381    | 0.602011        | -800.57  |
| <i>itb12g21430&amp;PGSC0003DMT400050141</i> | 0.0998264 | 1.86918  | 0.0534066 | 4.94E-28        | 255    | 0.547936        | -488.251 |
| <i>itb12g25750&amp;PGSC0003DMT400037204</i> | 0.158335  | 1.16841  | 0.135513  | 5.51E-31        | 405    | 0.442904        | -832.823 |

|                                                 |           |          |           |            |      |          |          |
|-------------------------------------------------|-----------|----------|-----------|------------|------|----------|----------|
| <i>itb13g21880&amp;PGSC0003DMT400015954</i>     | 0.604739  | 1.31886  | 0.458531  | 5.70E-28   | 1059 | 0.783719 | -2571.37 |
| <i>itb13g23030&amp;PGSC0003DMT400083194</i>     | 0.377839  | 2.82903  | 0.133557  | 0          | 1461 | 0.977852 | -3308.97 |
| <i>itb14g01030&amp;PGSC0003DMT400078487</i>     | 0.60093   | 0.626159 | 0.959709  | 0.658806   | 1050 | 0.60713  | -2526.75 |
| <i>itb14g01060&amp;PGSC0003DMT400015350</i>     | 0.216279  | 1.7255   | 0.125343  | 2.35E-45   | 435  | 0.521599 | -910.881 |
| <i>itb14g16600&amp;PGSC0003DMT400040203</i>     | 0.370787  | 1.58365  | 0.234134  | 3.16E-54   | 714  | 0.707399 | -1613.22 |
| <i>itb15g00310&amp;PGSC0003DMT400009920</i>     | 0.228158  | 1.18822  | 0.192016  | 6.78E-56   | 906  | 0.468059 | -1917.03 |
| <i>itb15g11860&amp;PGSC0003DMT400073578</i>     | 0.288882  | 1.64023  | 0.176123  | 1.01E-105  | 1221 | 0.586876 | -2691.65 |
| <i>itb15g13030&amp;PGSC0003DMT400063687</i>     | 0.57349   | 0.438458 | 1.30797   | 0.0148055  | 885  | 0.539738 | -2044.25 |
| <i>OIS95687&amp;PGSC0003DMT400078487</i>        | 0.160064  | 0.613304 | 0.260987  | 6.67E-27   | 1161 | 0.24622  | -2264.05 |
| <i>OIS97914&amp;PGSC0003DMT400009920</i>        | 0.468792  | 1.62175  | 0.289066  | 4.23E-40   | 879  | 0.801679 | -1900.19 |
| <i>OIS97914&amp;PGSC0003DMT400072448</i>        | 0.41457   | 0.875985 | 0.473261  | 1.20E-08   | 477  | 0.531936 | -1070.96 |
| <i>OIS98725&amp;PGSC0003DMT400056199</i>        | 0.0642516 | 0.454818 | 0.141269  | 9.94E-14   | 453  | 0.146316 | -782.362 |
| <i>OIT01620&amp;PGSC0003DMT400001032</i>        | 0.134146  | 0.527214 | 0.254442  | 6.08E-11   | 423  | 0.219811 | -797.128 |
| <i>OIT01983&amp;PGSC0003DMT400045359</i>        | 0.283793  | 0.992527 | 0.28593   | 6.94E-34   | 840  | 0.44399  | -1853.19 |
| <i>Os01i0507700-01&amp;PGSC0003DMT400078635</i> | 0.29937   | 3.19711  | 0.0936376 | 0          | 441  | 1        | -1023.74 |
| <i>PGSC0003DMT400001032&amp;AT3G24450</i>       | 0.292729  | 3.33597  | 0.0877493 | 0          | 399  | 0.88323  | -873.695 |
| <i>PGSC0003DMT400001501&amp;AT5G24580</i>       | 0.320564  | 2.21048  | 0.14502   | 3.08E-105  | 858  | 0.800826 | -1894.9  |
| <i>PGSC0003DMT400009920&amp;AT5G03380</i>       | 0.478632  | 2.57844  | 0.185629  | 0          | 963  | 1        | -2290.84 |
| <i>PGSC0003DMT400015350&amp;AT1G22990</i>       | 0.271817  | 3.45964  | 0.0785682 | 0          | 432  | 1        | -953.168 |
| <i>PGSC0003DMT400018392&amp;AT5G60800</i>       | 0.415165  | 2.87861  | 0.144224  | 0          | 732  | 0.99983  | -1646.35 |
| <i>PGSC0003DMT400032707&amp;AT4G33520</i>       | 0.514392  | 2.23315  | 0.230343  | 1.11E-72   | 678  | 1        | -1594.31 |
| <i>PGSC0003DMT400037204&amp;AT3G48970</i>       | 0.176086  | 3.50565  | 0.0502291 | 0          | 417  | 1        | -876.451 |
| <i>PGSC0003DMT400040203&amp;AT2G28660</i>       | 0.673518  | 0.686989 | 0.980391  | 0.851156   | 645  | 0.676691 | -1575.23 |
| <i>PGSC0003DMT400045359&amp;AT2G37390</i>       | 0.553018  | 0.752983 | 0.734436  | 0.00409719 | 645  | 0.598933 | -1577.76 |
| <i>PGSC0003DMT400056199&amp;AT4G39700</i>       | 0.216057  | 2.82269  | 0.076543  | 0          | 453  | 0.772722 | -950.172 |
| <i>PGSC0003DMT400056666&amp;AT4G39700</i>       | 0.141552  | 4.022    | 0.0351945 | 0          | 450  | 1        | -907.438 |
| <i>PGSC0003DMT400063687&amp;AT5G27690</i>       | 0.772629  | 1.55993  | 0.495298  | 7.24E-25   | 939  | 1        | -2269.97 |

|                                                     |          |          |           |          |      |          |          |
|-----------------------------------------------------|----------|----------|-----------|----------|------|----------|----------|
| <i>PGSC0003DMT400068079&amp;AT5G50740</i>           | 0.345197 | 3.68181  | 0.0937572 | 0        | 828  | 1        | -1806.92 |
| <i>PGSC0003DMT400072448&amp;AT2G36950</i>           | 1.12019  | 0.439755 | 2.54731   | 7.28E-10 | 423  | 0.936167 | -1031.82 |
| <i>PGSC0003DMT400073578&amp;AT3G05220</i>           | 0.702438 | 1.69614  | 0.414139  | 1.25E-43 | 1212 | 1        | -2910.51 |
| <i>PGSC0003DMT400078487&amp;AT1G23000</i>           | 0.608026 | 2.00073  | 0.303902  | 5.98E-70 | 924  | 0.955702 | -2264.95 |
| <i>PGSC0003DMT400078635&amp;AT1G71050</i>           | 0.252213 | 3.54554  | 0.0711352 | 0        | 438  | 1        | -977.164 |
| <i>PGSC0003DMT400083194&amp;AT3G06130</i>           | 0.412553 | 1.37449  | 0.30015   | 1.15E-64 | 1284 | 0.696085 | -2982.4  |
| <i>PGSC0003DMT400009920&amp;Zm00001d032873_T001</i> | 0.99499  | 1.0101   | 0.985044  | 0.837601 | 966  | 1        | -2393.73 |
| <i>PGSC0003DMT400078487&amp;Zm00001d008515_T001</i> | 0.719656 | 1.84144  | 0.390811  | 9.26E-54 | 1095 | 1        | -2662.52 |
| <i>PGSC0003DMT400063687&amp;Zm00001d007130_T001</i> | 0.628382 | 1.9469   | 0.322761  | 5.82E-77 | 876  | 1        | -2141.15 |
| <i>PGSC0003DMT400032707&amp;Zm00001d052801_T001</i> | 0.827484 | 0.700359 | 1.18151   | 0.121641 | 561  | 0.794401 | -1394.38 |

---

Table S5. Motif sequences of heavy-metal associated proteins in *S. tuberosum*, *A. thaliana*, *O. sativa* and *S. lycopersicum*.

| Motif | Consensus sequence                                                                                                                                                                                            | E-value   | Sites | Width |
|-------|---------------------------------------------------------------------------------------------------------------------------------------------------------------------------------------------------------------|-----------|-------|-------|
| 1     | 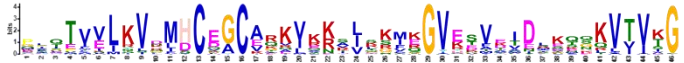<br>Best Possible Match: PLQTVVLKVDMHCEGCARKYKKSLSKMKGVESVEIDLKQQKVTYKG                                                      | 1.0e-912  | 50    | 46    |
| 2     | <br>Best Possible Match: MAIGAGTDIAIEAADIVLMRSNLEDVITAIIDL SRKTF SRIRLNYWAMAYNVIAPIAAGVLPFTRFRLPPWLAGACMAASSVSVCSLLLKRYKPPR | 1.1e-714  | 13    | 100   |
| 3     | <br>Best Possible Match: VLVYGMTCEGCASSYERILK LKLPGVFSASYDLLTSKVTVKG                                                         | 4.5e-605  | 50    | 41    |
| 4     | <br>Best Possible Match: PGEKVPVDGVVYWGQSHVNESMITGESRPVAKKSTVIGGTINLNGVLHIKATKVGESALSQIVRLVETAQMSKAPYQ                      | 1.8e-542  | 15    | 80    |
| 5     | <br>Best Possible Match: IACPCALGLATPTAYMVAIVGASQGVLIKGGDALERAQYDCYIFDKTGTLTQGKPVVTTTK                                      | 1.0e-477  | 15    | 63    |
| 6     | <br>Best Possible Match: PTEVYPPQMFSDENPNACSIM                                                                               | 1.2e-358  | 40    | 21    |
| 7     | <br>Best Possible Match: MGDLLKWLXTPVQFGIGRRFFYYGAYRALRHGSTNMDVLYALGTNAAYFYSVYSLLY                                        | 3.6e-319  | 13    | 57    |
| 8     | <br>Best Possible Match: DPLKLV ERYQKKTGKQVELV SPLKPP EE                                                                   | 1.60E-294 | 37    | 29    |
| 9     | <br>Best Possible Match: FASLP GKGYQC L GKVVGNRLMENGILPEEFELYEL EEA TGLLVAIDFLYGLXLSISDPLKREAAYVYSG                       | 3.50E-229 | 10    | 80    |



|    |                                                                                                         |                                                                                    |           |    |    |
|----|---------------------------------------------------------------------------------------------------------|------------------------------------------------------------------------------------|-----------|----|----|
| 10 | Best Possible Match: FSSLPGKGVQCLINGKWILVGNRSLMTENGINPVEAEFLXEESAQTGILVAIDSELIGVLSISDPLKREAAVVYSG       |  | 1.30E-298 | 9  | 80 |
| 11 | Best Possible Match: GASTGFWSPPDYFETSAMLIIFYLLGKYLEVLAKGKTSDAIKKLVELAPATAITLLTKDKEGKVVGEREIDALLIQPGDYLK |   | 1.30E-164 | 15 | 21 |
| 12 | Best Possible Match: VVAMVGDGINDSPALAAADV                                                               |   | 2.20E-144 | 13 | 29 |
| 13 | Best Possible Match: KFADYIASIFVPTVITLSLLTFLGWFLAG                                                      |   | 2.00E-139 | 24 | 21 |
| 14 | Best Possible Match: KVLKVKKTGKKAIEFWPVVY                                                               |   | 3.50E-172 | 15 | 41 |
| 15 | Best Possible Match: FSGMDLGEFTLVASAEASSEHPLAKAIVEYAKKFHFEEEP                                           |   | 6.70E-148 | 18 | 29 |
|    | Best Possible Match: DPSLVSKEDILEAIEDAGFEAELISSSEQ                                                      |                                                                                    |           |    |    |

Table S6. Abiotic stress-related cis-acting elements in the promoter region of StHMA genes.

| Gene           | ABRE   |                                     | LTR    |                         | MBS    |                        |
|----------------|--------|-------------------------------------|--------|-------------------------|--------|------------------------|
|                | Number | Position                            | Number | Position                | Number | Position               |
| <i>StHMA1</i>  | 3      | +703,+704,-1137                     | 0      |                         | 0      |                        |
| <i>StHMA2</i>  | 2      | +689,-905                           | 0      |                         | 2      | +224,+253              |
| <i>StHMA3</i>  | 0      |                                     | 1      | +465                    | 0      |                        |
| <i>StHMA4</i>  | 1      | +798                                | 1      | -961                    | 0      |                        |
| <i>StHMA5</i>  | 1      | -365                                | 2      | +1817,+1827             | 0      |                        |
| <i>StHMA6</i>  | 1      | -922                                | 0      |                         | 4      | +1649,+960,-1207,-1682 |
| <i>StHMA7</i>  | 6      | +1316,+1319,+1743,+1821,-1318,-1742 | 1      | +407                    | 0      |                        |
| <i>StHMA8</i>  | 0      |                                     | 1      | -1013                   | 0      |                        |
| <i>StHMA9</i>  | 1      | +60                                 | 1      | +1271                   | 0      |                        |
| <i>StHMA10</i> | 5      | +1155,+117,+347,-1411,-1413         | 0      |                         | 2      | -1981,-992             |
| <i>StHMA11</i> | 1      | -135                                | 2      | +143,-292               | 0      |                        |
| <i>StHMA12</i> | 0      |                                     | 0      |                         | 0      |                        |
| <i>StHMA13</i> | 2      | +753,+754                           | 1      | -1412                   | 1      | -1058                  |
| <i>StHMA14</i> | 4      | +1758,+1761,-1677,-1760             | 0      |                         | 1      | -1794                  |
| <i>StHMA15</i> | 2      | +648,+649                           | 0      |                         | 0      |                        |
| <i>StHMA16</i> | 0      |                                     | 0      |                         | 0      |                        |
| <i>StHMA17</i> | 0      |                                     | 4      | +1260,+1532,+1634,-1186 | 0      |                        |
| <i>StHMA18</i> | 4      | +1100,+1349,-1064,-745              | 0      |                         | 0      |                        |
| <i>StHMA19</i> | 6      | +590,+591,+627,+629,+630,+653       | 0      |                         | 0      |                        |
| <i>StHMA20</i> | 6      | +596,+597,+633,+635,+636,+659       | 0      |                         | 0      |                        |
| <i>StHMA21</i> | 2      | +296,+297                           | 0      |                         | 0      |                        |
| <i>StHMA22</i> | 3      | +179,+181,+182                      | 0      |                         | 0      |                        |
| <i>StHMA23</i> | 2      | +122,+123                           | 0      |                         | 0      |                        |
| <i>StHMA24</i> | 2      | +499,-587                           | 1      | +1795                   | 1      | +1557                  |
| <i>StHMA25</i> | 4      | +1266,+1806,+1809,-1808             | 0      |                         | 1      | +1861                  |

|                |   |                |   |       |         |
|----------------|---|----------------|---|-------|---------|
| <i>StHMA26</i> | 2 | +139,+1707     | 0 |       | 0       |
| <i>StHMA27</i> | 0 |                | 1 | +308  | 0       |
| <i>StHMA28</i> | 1 | -1235          | 1 | +301  | 0       |
| <i>StHMA29</i> | 3 | +326,+327,+339 | 1 | -1258 | 0       |
| <i>StHMA30</i> | 2 | +1007,+460     | 0 |       | 1 -738  |
| <i>StHMA31</i> | 2 | +1234,-1235    | 0 |       | 1 -275  |
| <i>StHMA32</i> | 1 | -1837          | 0 |       | 0       |
| <i>StHMA33</i> | 1 | +1341          | 0 |       | 1 -359  |
| <i>StHMA34</i> | 1 | +1843          | 0 |       | 0       |
| <i>StHMA35</i> | 2 | +213,+214      | 1 | -825  | 1 -1203 |
| <i>StHMA36</i> | 1 | +1565          | 0 |       | 0       |

| Gene           | MYB    |                                                                   | MYC    |                                           | W-box  |             |
|----------------|--------|-------------------------------------------------------------------|--------|-------------------------------------------|--------|-------------|
|                | Number | Position                                                          | Number | Position                                  | Number | Position    |
| <i>StHMA1</i>  | 5      | +1821,+437,+652,-1521,-1665                                       | 8      | +1295,+21,+299,+339,+469,+728,-1531,-1655 | 1      | +1342       |
| <i>StHMA2</i>  | 5      | +1886,+224,+253,+294,-870                                         | 4      | +1771,+198,+646,+67                       | 0      |             |
| <i>StHMA3</i>  | 1      | +1084                                                             | 1      | +1809                                     | 0      |             |
| <i>StHMA4</i>  | 1      | +1881                                                             | 2      | -153,-710                                 | 1      | -688        |
| <i>StHMA5</i>  | 2      | -1071,-1807                                                       | 6      | +1048,+1286,+1795,+1914,+547,-290         | 0      |             |
| <i>StHMA6</i>  | 8      | +1045,+1649,+960,-1207,-1499,-1682,-1869,-28                      | 7      | +1250,+1373,-1749,-1797,-1851,-236,-409   | 2      | +1234,+1253 |
| <i>StHMA7</i>  | 3      | -1281,-1461,-380                                                  | 1      | +142                                      | 0      |             |
| <i>StHMA8</i>  | 13     | +1568,+200,+571,+673,-212,-265,-307,-349,-391,-433,-475,-517,-559 | 5      | +1623,+1895,+4,-1164,-1485                | 0      |             |
| <i>StHMA9</i>  | 3      | +1112,+1436,-1148                                                 | 4      | +1753,+665,+966,-1440                     | 1      | +1353       |
| <i>StHMA10</i> | 3      | -1485,-1981,-992                                                  | 7      | +1029,+1218,+1470,+952,-1911,-737,-998    | 1      | +987        |
| <i>StHMA11</i> | 2      | +1884,+789                                                        | 3      | +909,-1549,-1573                          | 1      | +483        |
| <i>StHMA12</i> | 1      | +1719                                                             | 3      | +1723,-1273,-305                          | 1      | -1116       |
| <i>StHMA13</i> | 3      | +480,-1058,-1783                                                  | 0      |                                           | 0      |             |

|                |   |                                           |   |                                                |   |                      |
|----------------|---|-------------------------------------------|---|------------------------------------------------|---|----------------------|
| <i>StHMA14</i> | 2 | -1794,-1858                               | 1 | -514                                           | 3 | +1419,+1470,+79      |
| <i>StHMA15</i> | 1 | -1706                                     | 5 | +1172,+1636,+1721,+321,-24                     | 1 | -788                 |
| <i>StHMA16</i> | 2 | +1546,-699                                | 4 | +171,+482,-259,-30                             | 2 | +1578,+987           |
| <i>StHMA17</i> | 6 | +1326,+1524,+53,-1346,-148,-1488          | 1 | +653                                           | 0 |                      |
| <i>StHMA18</i> | 4 | +241,+329,+622,-1420                      | 2 | +1327,+384                                     | 0 |                      |
| <i>StHMA19</i> | 2 | +398,-410                                 | 0 |                                                | 1 | +1073                |
| <i>StHMA20</i> | 2 | +404,-416                                 | 3 | +1476,-1144,-24                                | 0 |                      |
| <i>StHMA21</i> | 1 | -20                                       | 6 | +1441,+1688,+1822,+1925,+845,-252              | 0 |                      |
| <i>StHMA22</i> | 0 |                                           | 2 | +1327,+971                                     | 0 |                      |
| <i>StHMA23</i> | 4 | +1004,+1879,-1930,-711                    | 3 | +1051,-1008,-372                               | 1 | +1623                |
| <i>StHMA24</i> | 1 | +1557                                     | 1 | -1627                                          | 1 | -1916                |
| <i>StHMA25</i> | 5 | +1861,+724,-1352,-166,-505                | 2 | +501,+635                                      | 0 |                      |
| <i>StHMA26</i> | 4 | +1748,+1948,+83,-1475                     | 8 | +127,+1514,+322,+869,-238,-287,-30,-575        | 1 | +1311                |
| <i>StHMA27</i> | 2 | +264,-1281                                | 2 | +408,-723                                      | 1 | -58                  |
| <i>StHMA28</i> | 1 | +1798                                     | 4 | +1924,+686,+713,-1392                          | 0 |                      |
| <i>StHMA29</i> | 4 | +1039,+1459,+1934,-1416                   | 3 | +1205,+1467,-351                               | 4 | +507,+743,+947,-1413 |
| <i>StHMA30</i> | 4 | +1574,+1825,+519,-738                     | 6 | +1666,+1795,+1879,+1956,-116,-744              | 0 |                      |
| <i>StHMA31</i> | 5 | +1937,+555,-1062,-275,-660                | 4 | +1480,+322,+926,-1043                          | 0 |                      |
| <i>StHMA32</i> | 8 | +1216,+272,+422,+47,+83,-1105,-1219,-1851 | 9 | +185,+612,+782,+828,+901,+970,-1202,-1534,-453 | 0 |                      |
| <i>StHMA33</i> | 2 | +466,-359                                 | 4 | +128,+1659,+571,-985                           | 2 | +131,+84             |
| <i>StHMA34</i> | 1 | -434                                      | 5 | +919,-1036,-126,-448,-570                      | 1 | -1321                |
| <i>StHMA35</i> | 1 | -1203                                     | 6 | +462,+626,+928,-293,-419,-542                  | 0 |                      |
| <i>StHMA36</i> | 7 | +1327,+1576,+1812,+864,-577,-651,-685     | 7 | +1243,+1294,-1108,-1309,-1350,-1416,-1457      | 2 | +580,-153            |

---

Table S7. RNA-seq data of potato *StHMA* genes in different tissues.

|                | stolon | young tuber | flower | leaf   | shoot apex | petiole | stem   | mature tuber | root   | stamen | tuber peel | tuber cortex | tuber pith | tuber sprout | whole in vitro plant |
|----------------|--------|-------------|--------|--------|------------|---------|--------|--------------|--------|--------|------------|--------------|------------|--------------|----------------------|
| <i>StHMA1</i>  | 5.00   | 4.00        | 9.00   | 15.00  | 1.00       | 13.00   | 10.00  | 3.00         | 20.00  | 18.00  | 0.90       | 5.00         | 2.00       | 9.00         | 14.00                |
| <i>StHMA2</i>  | 7.00   | 3.00        | 4.00   | 16.00  | 0.70       | 29.00   | 6.00   | 3.00         | 38.00  | 7.00   | 1.00       | 7.00         | 2.00       | 4.00         | 9.00                 |
| <i>StHMA3</i>  | 168.00 | 163.00      | 108.00 | 23.00  | 104.00     | 91.00   | 143.00 | 90.00        | 76.00  | 9.00   | 67.00      | 80.00        | 86.00      | 105.00       | 59.00                |
| <i>StHMA4</i>  | 231.00 | 192.00      | 151.00 | 55.00  | 48.00      | 478.00  | 323.00 | 57.00        | 259.00 | 30.00  | 237.00     | 164.00       | 133.00     | 725.00       | 328.00               |
| <i>StHMA5</i>  | 99.00  | 34.00       | 29.00  | 58.00  | 15.00      | 70.00   | 61.00  | 16.00        | 127.00 | 7.00   | 7.00       | 24.00        | 13.00      | 57.00        | 79.00                |
| <i>StHMA6</i>  | 6.00   | 1.00        | 3.00   | 0.80   | 0.50       | 0.00    | 0.50   | 0.00         | 0.00   | 0.30   | 0.00       | 0.00         | 0.00       | 0.00         | 0.00                 |
| <i>StHMA7</i>  | 127.00 | 72.00       | 55.00  | 83.00  | 140.00     | 36.00   | 55.00  | 80.00        | 29.00  | 14.00  | 54.00      | 39.00        | 38.00      | 62.00        | 63.00                |
| <i>StHMA8</i>  | 290.00 | 299.00      | 174.00 | 253.00 | 230.00     | 904.00  | 453.00 | 173.00       | 267.00 | 19.00  | 162.00     | 273.00       | 233.00     | 309.00       | 279.00               |
| <i>StHMA9</i>  | 34.00  | 34.00       | 45.00  | 27.00  | 25.00      | 115.00  | 76.00  | 48.00        | 91.00  | 61.00  | 53.00      | 52.00        | 44.00      | 66.00        | 109.00               |
| <i>StHMA10</i> | 0.50   | 0.50        | 1.00   | 0.00   | 0.00       | 0.50    | 0.00   | 2.00         | 1.00   | 0.00   | 4.00       | 10.00        | 4.00       | 29.00        | 29.00                |
| <i>StHMA11</i> | 8.00   | 16.00       | 6.00   | 8.00   | 13.00      | 26.00   | 13.00  | 10.00        | 70.00  | 2.00   | 7.00       | 12.00        | 7.00       | 93.00        | 31.00                |
| <i>StHMA12</i> | 1.00   | 8.00        | 3.00   | 9.00   | 2.00       | 11.00   | 10.00  | 0.00         | 9.00   | 1.00   | 1.00       | 2.00         | 0.50       | 8.00         | 7.00                 |
| <i>StHMA13</i> | 24.00  | 4.00        | 2.00   | 1.00   | 2.00       | 5.00    | 8.00   | 0.00         | 13.00  | 0.00   | 0.00       | 0.00         | 0.00       | 4.00         | 2.00                 |
| <i>StHMA14</i> | 141.00 | 42.00       | 74.00  | 51.00  | 39.00      | 47.00   | 75.00  | 89.00        | 16.00  | 105.00 | 73.00      | 76.00        | 109.00     | 34.00        | 48.00                |
| <i>StHMA15</i> | 13.00  | 156.00      | 99.00  | 3.00   | 80.00      | 34.00   | 144.00 | 194.00       | 108.00 | 12.00  | 104.00     | 123.00       | 151.00     | 40.00        | 13.00                |
| <i>StHMA16</i> | 0.00   | 0.00        | 0.00   | 0.00   | 0.00       | 0.00    | 0.00   | 0.00         | 15.00  | 0.00   | 1.00       | 0.00         | 0.00       | 23.00        | 43.00                |
| <i>StHMA17</i> | 114.00 | 12.00       | 32.00  | 24.00  | 0.00       | 0.70    | 8.00   | 0.00         | 0.00   | 0.20   | 0.00       | 0.00         | 0.00       | 3.00         | 8.00                 |
| <i>StHMA18</i> | 8.00   | 21.00       | 16.00  | 2.00   | 68.00      | 2.00    | 32.00  | 36.00        | 472.00 | 0.50   | 38.00      | 11.00        | 11.00      | 28.00        | 26.00                |
| <i>StHMA19</i> | 0.00   | 0.50        | 1.00   | 0.00   | 0.00       | 0.90    | 0.00   | 0.00         | 0.80   | 0.00   | 0.00       | 0.00         | 0.00       | 4.00         | 0.00                 |
| <i>StHMA20</i> | 0.00   | 0.70        | 2.00   | 0.00   | 0.00       | 0.00    | 0.00   | 0.00         | 2.00   | 0.00   | 0.00       | 0.40         | 0.00       | 2.00         | 0.50                 |
| <i>StHMA21</i> | 198.00 | 45.00       | 13.00  | 32.00  | 67.00      | 38.00   | 36.00  | 38.00        | 5.00   | 0.00   | 12.00      | 17.00        | 24.00      | 26.00        | 14.00                |
| <i>StHMA22</i> | 0.00   | 40.00       | 0.00   | 0.00   | 93.00      | 0.00    | 0.00   | 21.00        | 23.00  | 0.00   | 29.00      | 5.00         | 2.00       | 36.00        | 2.00                 |
| <i>StHMA23</i> | 0.00   | 0.50        | 0.00   | 0.20   | 1.00       | 0.80    | 0.00   | 0.30         | 0.50   | 1.00   | 0.70       | 0.00         | 0.00       | 0.50         | 0.00                 |
| <i>StHMA24</i> | 59.00  | 75.00       | 76.00  | 60.00  | 75.00      | 112.00  | 65.00  | 52.00        | 143.00 | 87.00  | 32.00      | 36.00        | 23.00      | 72.00        | 146.00               |
| <i>StHMA25</i> | 52.00  | 84.00       | 37.00  | 16.00  | 99.00      | 124.00  | 179.00 | 236.00       | 129.00 | 22.00  | 291.00     | 307.00       | 497.00     | 362.00       | 105.00               |

|                |       |       |        |       |       |        |        |       |        |        |       |       |        |        |        |
|----------------|-------|-------|--------|-------|-------|--------|--------|-------|--------|--------|-------|-------|--------|--------|--------|
| <i>StHMA26</i> | 7.00  | 0.00  | 0.00   | 0.00  | 0.60  | 0.00   | 0.60   | 0.00  | 0.30   | 0.00   | 0.00  | 0.00  | 0.00   | 0.00   | 0.00   |
| <i>StHMA27</i> | 1.00  | 0.00  | 0.00   | 0.70  | 0.90  | 2.00   | 0.40   | 2.00  | 24.00  | 0.20   | 1.00  | 5.00  | 2.00   | 3.00   | 2.00   |
| <i>StHMA28</i> | 30.00 | 11.00 | 120.00 | 30.00 | 26.00 | 28.00  | 71.00  | 45.00 | 306.00 | 318.00 | 73.00 | 96.00 | 133.00 | 106.00 | 113.00 |
| <i>StHMA29</i> | 0.00  | 0.00  | 0.00   | 0.00  | 4.00  | 0.00   | 0.00   | 13.00 | 0.40   | 0.00   | 9.00  | 0.00  | 0.00   | 3.00   | 0.50   |
| <i>StHMA30</i> | 19.00 | 3.00  | 11.00  | 18.00 | 0.40  | 14.00  | 6.00   | 2.00  | 11.00  | 3.00   | 0.90  | 4.00  | 2.00   | 8.00   | 18.00  |
| <i>StHMA31</i> | 3.00  | 2.00  | 10.00  | 5.00  | 0.50  | 2.00   | 0.70   | 0.30  | 1.00   | 13.00  | 2.00  | 0.50  | 0.20   | 3.00   | 2.00   |
| <i>StHMA32</i> | 2.00  | 1.00  | 0.00   | 6.00  | 4.00  | 2.00   | 3.00   | 0.60  | 0.20   | 0.00   | 0.60  | 2.00  | 1.00   | 1.00   | 6.00   |
| <i>StHMA33</i> | 59.00 | 66.00 | 90.00  | 68.00 | 13.00 | 274.00 | 311.00 | 48.00 | 78.00  | 150.00 | 21.00 | 15.00 | 16.00  | 32.00  | 473.00 |
| <i>StHMA34</i> | 35.00 | 70.00 | 14.00  | 15.00 | 55.00 | 9.00   | 15.00  | 30.00 | 18.00  | 2.00   | 10.00 | 19.00 | 15.00  | 19.00  | 8.00   |
| <i>StHMA35</i> | 7.00  | 6.00  | 0.40   | 4.00  | 2.00  | 12.00  | 5.00   | 6.00  | 31.00  | 0.00   | 1.00  | 0.90  | 0.00   | 14.00  | 36.00  |
| <i>StHMA36</i> | 5.00  | 14.00 | 7.00   | 3.00  | 4.00  | 15.00  | 24.00  | 10.00 | 1.00   | 2.00   | 3.00  | 3.00  | 2.00   | 2.00   | 6.00   |

---
